# Supplementary material for: Biomolecule-assisted synthesis of carbon nitride and sulfur-doped carbon nitride heterojunction nanosheets: An efficient heterojunction photocatalyst for photoelectrochemical applications
Source: publisher site journal article supplement (doi:10.3762/bjnano.5.89), 2014-06-03
Supplement: Additional file 1 [file 2190-4286-5-89-S1.pdf]

## **Supporting Information**

for

### **Biomolecule-assisted synthesis of carbon nitride and sulfur-doped carbon nitride heterojunction nanosheets: An efficient heterojunction photocatalyst for photoelectrochemical applications**

Hua Bing Tao, Hong Bin Yang<sup>\*</sup>, Jiazang Chen, Jianwei Miao and Bin Liu<sup>\*</sup>

Address: School of Chemical and Biomedical Engineering, Nanyang Technological University, 62 Nanyang Drive, Singapore 637459, Singapore

Emails: Hong Bin Yang<sup>\*</sup> - hbyang@ntu.edu.sg; Bin Liu<sup>\*</sup> - liubin@ntu.edu.sg

<sup>\*</sup> Corresponding author

## **Additional experimental data**

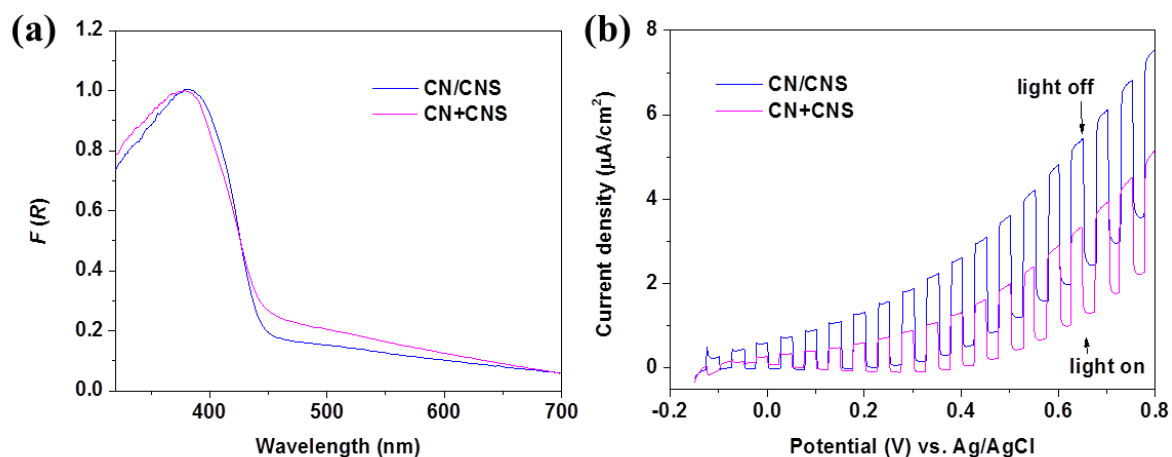

**Figure S1:** (a) Optical absorption spectra of CN/CNS and CN+CNS samples. (b) Current density–voltage ( $J$ – $V$ ) curves for CN/CNS and CN+CNS electrodes under simulated sunlight (AM 1.5,  $100 \text{ mW/cm}^2$ ). All experiments were performed in 0.2 M  $\text{Na}_2\text{SO}_4$  aqueous solution at a scan rate of 10 mV/s.

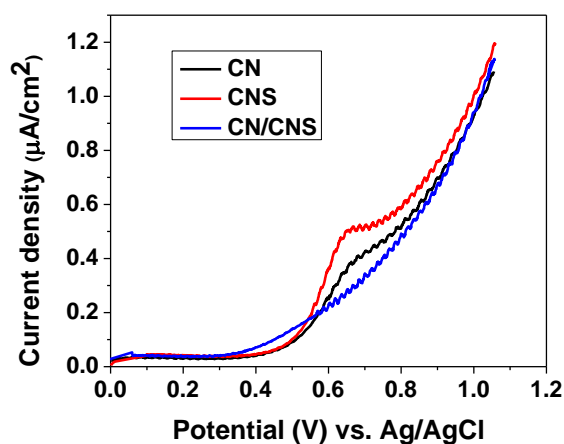

**Figure S2:** Linear Sweep Voltammetry of CN, CNS and CN/CNS electrodes under dark condition. All experiments were performed in 0.2 M  $\text{Na}_2\text{SO}_4$  aqueous solution at a scan rate of 10 mV/s.
